# Supplementary material for: Results of a Coordinated Specialty Care Program for Early Psychosis and Predictors of Outcomes
Source: Atypon-hosted journal article supplement (doi:10.1176/appi.ps.201700436), 2018-05-15
Supplement: appi.ps.201700436.ds001.pdf [file appi.ps.201700436.ds001.pdf]

**Proportion of clients with scores higher than 40 and 70.**

| Follow up Time | GAF SF     |            | GAF OC     |            | GAF Sym    |            |
|----------------|------------|------------|------------|------------|------------|------------|
|                | % above 40 | % above 70 | % above 40 | % above 70 | % above 40 | % above 70 |
| Baseline       | 81.85      | 19.69      | 30.56      | 8.64       | 28.00      | 2.46       |
| 3 months       | 89.91      | 34.70      | 54.31      | 24.28      | 56.78      | 7.57       |
| 6 months       | 93.36      | 39.45      | 68.11      | 29.13      | 71.21      | 8.95       |
| 9 months       | 95.29      | 46.60      | 70.68      | 38.22      | 74.87      | 17.28      |
| 12 months      | 97.71      | 57.25      | 74.05      | 41.22      | 73.08      | 28.46      |

**Predictors of Follow-up (3, 6, 9, 12 month) outcomes only controlling for baseline demographics and baseline outcome, not mutually controlling other predictors.**

| Predictors                    | GAF SF |         |       | GAF OC |         |       | GAF Sym |         |        | Education/Employment |         |       | Hosp. for Psych Cond. |         |       |
|-------------------------------|--------|---------|-------|--------|---------|-------|---------|---------|--------|----------------------|---------|-------|-----------------------|---------|-------|
|                               | Beta   | Std Err | p-val | Beta   | Std Err | p-val | Beta    | Std Err | p-val  | Logodds              | Std Err | p-val | Logodds               | Std Err | p-val |
| Baseline Education/Employment | 1.968  | 1.227   | .109  |        |         |       | 1.953   | 1.672   | .243   |                      |         |       | -.236                 | .266    | .375  |
| Baseline GAF Symptoms         | -.053  | .035    | .123  | .092   | .071    | .199  |         |         |        | .012                 | .008    | .122  | -.027                 | .009    | .003* |
| Time to Intervention (days)   | -.011  | .091    | .902  | -.255  | .164    | .12   | -.45    | .123    | <.001* | .003                 | .019    | .878  | .014                  | .02     | .498  |
| Substance Use                 | 1.918  | 1.159   | .098  | -2.064 | 2.022   | .307  | .466    | 1.655   | .778   | .177                 | .234    | .449  | .298                  | .267    | .264  |
| Medication Adherence (ref=No) |        |         |       |        |         |       |         |         |        |                      |         |       |                       |         |       |
| Yes                           | 1.167  | 1.271   | .358  | -1.56  | 1.668   | .35   | 2.532   | 1.488   | .089   | -.221                | .303    | .466  | .152                  | .334    | .649  |
| No Meds Prescribed            | 2.103  | 1.508   | .163  | 3.012  | 2.18    | .167  | 7.12    | 2.096   | <.001* | .073                 | .364    | .842  | -1.311                | .667    | .049* |
| Unknown                       | -.105  | 2.887   | .971  | -.195  | 4.249   | .963  | -.126   | 5.022   | .98    | -.15                 | .657    | .819  | .801                  | .626    | .201  |
| Suicidal Ideation/Behavior    |        |         |       |        |         |       |         |         |        |                      |         |       | -.058                 | .277    | .834  |
| Violent Ideation/Behavior     |        |         |       |        |         |       |         |         |        |                      |         |       | .439                  | .257    | .087  |

Each outcome model is run separately for each predictor while controlling for follow-up time, follow-up site, demographics, and baseline of the respective outcome.

\*p-value <.05
